# Supplementary material for: Morpho-functional comparison of differentiation protocols to create iPSC-derived cardiomyocytes
Source: PubMed Central journal article supplement (PMC8890088; doi:10.1242/bio.059016), 2022-02-23
Supplement: biolopen-11-059016-s1.pdf [file biolopen-11-059016-s1.pdf]

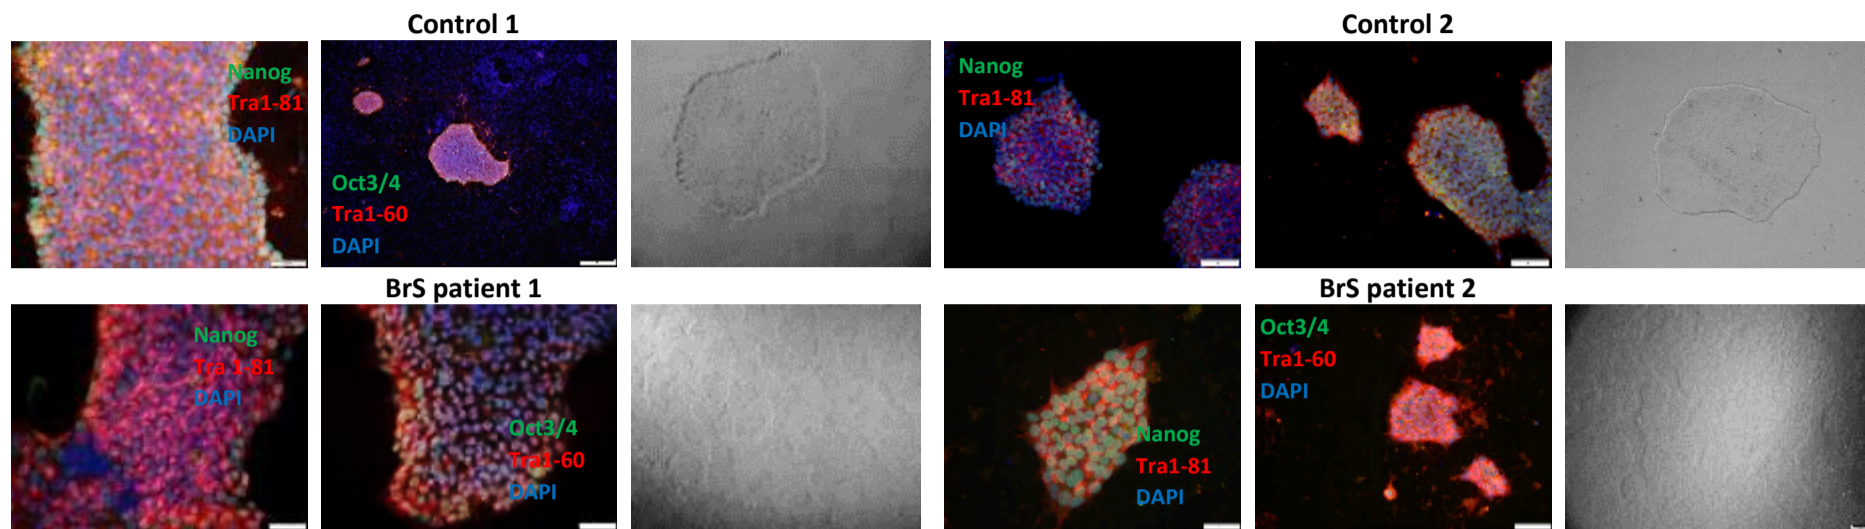

**Fig. S1.** Bright field images and representative immunofluorescence staining of pluripotency markers of iPSCs of Control 1, Control 2, BrS patient 1 and BrS patient 2.

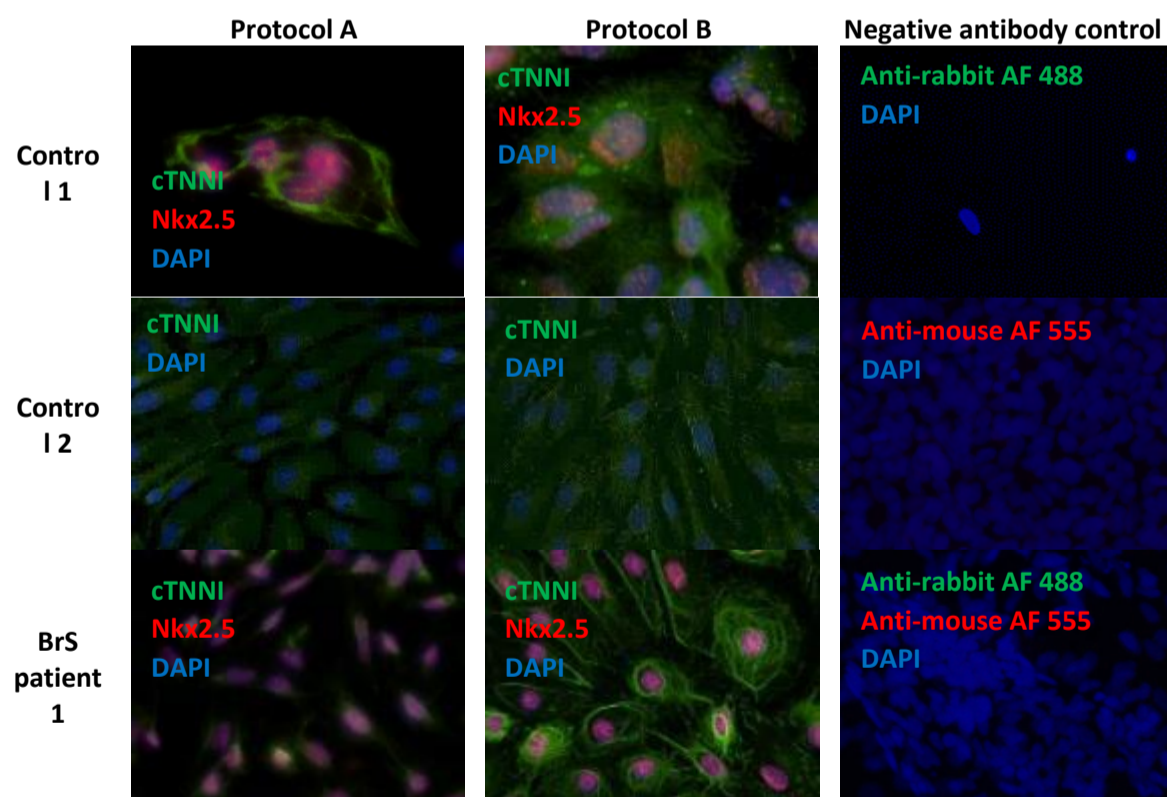

**Fig. S2.** Immunofluorescence staining of cTNNI of iPSC-CMs of Control 1, 2 and BrS patient 1 generated with protocol A and B in the comparison experiment. No cTNNI or Nkx2.5 staining was performed on iPSC-CMs from BrS patient 2 due to low amount of contracting areas on coverslips, which were used for electrophysiological tests and ICC staining for cACT. Negative secondary antibody controls (anti-rabbit Alexa Fluor 488 and/or anti-mouse Alexa Fluor 555) are shown in the right column.

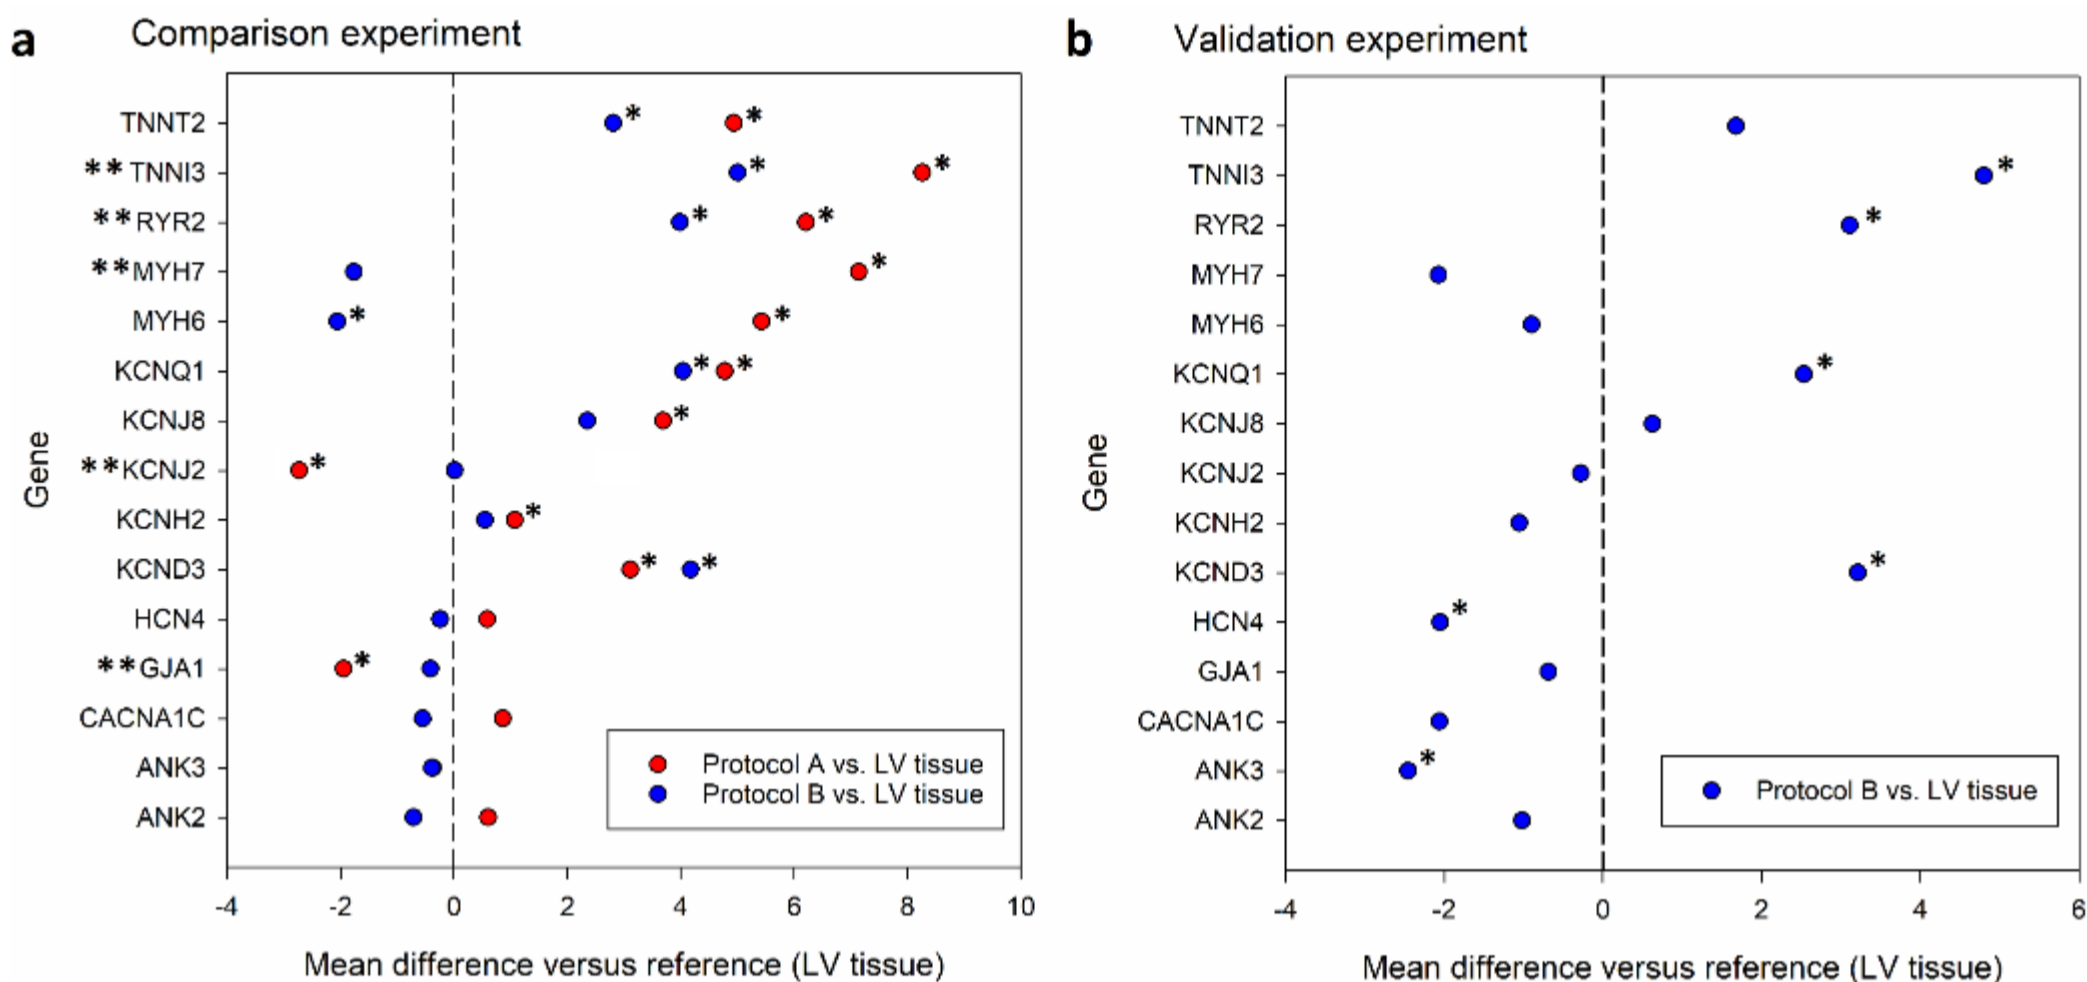

**Fig. S3. Measured Ct values for all tested genes in iPSC-CMs generated using protocol A (in red) and protocol B (in blue) in relation to left ventricle (0 level on the x axis) from samples obtained in the comparison (a) and validation (b) experiment.**

The figures show graphical overview of the difference in the measured mean Ct values. Values for iPSC-CMs generated with protocol B in comparison experiment show closer resemblance to those in the reference tissue in comparison to iPSC-CMs generated with protocol A. \* $p \leq 0.05$  for Ct comparison between the used protocol versus reference tissue (left ventricle of the healthy donor heart); \*\* $p \leq 0.05$  for Ct comparison between protocols A and B.

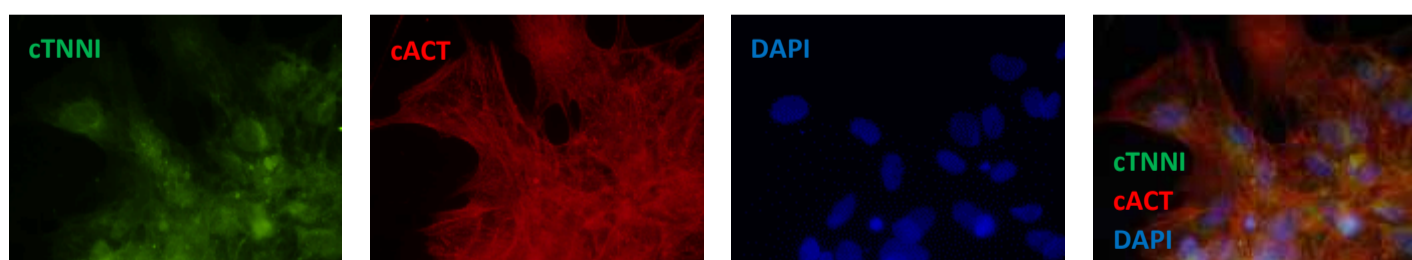

**Fig. S4. Unmerged immunofluorescence staining images of cardiac markers cACT and cTNNI obtained from iPSC-CMs in the validation experiment (merged images are presented in Figure 4a).**

**Table S1. CNVs (larger than 100kb) detected in the used iPSC-lines.**

| Cell line            | CNV type                   | CNV minimal region            | CNV size (bp) | Genes in the region   |
|----------------------|----------------------------|-------------------------------|---------------|-----------------------|
| <b>Control 1</b>     | del                        | Chr1:1,030,565-1,266,041      | 235477        | ACAP3, mir429, TTLL10 |
|                      | del                        | Chr1:2,532,899-2,745,883      | 212985        | MMEL1                 |
|                      | del                        | Chr1:191,618,129-191,875,752  | 257624        |                       |
|                      | del                        | Chr4:994,414-1,188,049        | 193636        | FGFRL1                |
|                      | del                        | Chr4:34,049,908-34,423,079    | 373172        | LINC02484             |
|                      | del                        | Chr4:43,363,694-43,526,808    | 163115        | LINC02383             |
|                      | del                        | Chr4:113,294,328-113,779,891  | 485564        | ALPK1, mir367         |
|                      | del                        | Chr6:27,002,406-27,194,072    | 191667        | HIST1H2AG             |
|                      | del                        | Chr8:78,359,134-78,510,649    | 151516        | LOC102724874          |
|                      | del                        | Chr8:144,669,392-144,861,985  | 192594        | BREA2, PYCR3          |
|                      | del                        | Chr8:144,998,779-145,268,000  | 269222        | CYC1, MROH1           |
|                      | dup                        | Chr10:54,002,021-54,141,652   | 139632        | DKK1                  |
|                      | del                        | Chr11:39,066,761-39,266,095   | 199335        |                       |
|                      | del                        | Chr14:105,285,159-105,395,204 | 110046        | CEP170B               |
|                      | del                        | Chr19:1,341,509-1,497,060     | 155552        | APC2                  |
|                      | del                        | Chr19:1,566,043-1,712,898     | 146856        | MBD3                  |
|                      | dup                        | ChrX:71,284,941-71,411,659    | 126719        | FLI44635              |
| dup                  | ChrX:91,685,124-92,178,902 | 493779                        | PCDH11X       |                       |
| <b>Control 2</b>     | del                        | Chr16:32,624,879-32,855,389   | 230511        | TP53TG3               |
|                      | dup                        | Chr19:54,737,010-54,841,732   | 104723        | LILRA3                |
|                      | dup                        | ChrX:48,645,256-48,746,726    | 101471        | ERAS                  |
|                      | dup                        | ChrX:153,051,907-153,197,130  | 145224        | ARHGAP4               |
| <b>BrS patient 1</b> | -                          | -                             | -             | -                     |
| <b>BrS patient 2</b> | dup                        | Chr9:2,407,101-2,618,969      | 211869        | VLDLR-AS1             |
|                      | del                        | Chr10:68,196,544-68,517,908   | 321365        | CTNNA3                |
|                      | del                        | Chr11:90,802,950-90,926,931   | 123982        |                       |
|                      | del                        | Chr16:32,564,812-32,959,259   | 394448        | SLC6A10P              |
|                      | del                        | ChrX:7,564,428-7,736,547      | 172120        |                       |

Del = deletion, dup = duplication

**Table S2. Differentiation efficiency based on immunofluorescence staining for cACT (comparison experiment).**

|               | Protocol A                |                      | Efficiency | Protocol B                |                           | Efficiency |
|---------------|---------------------------|----------------------|------------|---------------------------|---------------------------|------------|
|               | Dissociated iPSC-CMs      |                      |            | Dissociated iPSC-CMs      |                           |            |
| Control 1     |                           |                      | 80%        |                           |                           | 100%       |
| Control 2     | Non-dissociated monolayer |                      | 89.5 %     | Non-dissociated monolayer | Non-dissociated monolayer | 83.65 %    |
|               |                           |                      |            |                           |                           |            |
| BrS patient 1 | Non-dissociated monolayer | Dissociated iPSC-CMs | 91.2 %     | Non-dissociated monolayer | Dissociated iPSC-CMs      | 100 %      |
|               |                           |                      |            |                           |                           |            |
| BrS patient 2 | Dissociated iPSC-CMs      |                      | 100 %      | Dissociated iPSC-CMs      |                           | 100 %      |
|               |                           |                      |            |                           |                           |            |

**Table S3.** Calculated p values for the tested cardiac markers for qPCR data on samples from the comparison between the two protocols and in relation to the reference tissue (left ventricle of a healthy human heart donor).

| Tested gene    | Protocol A vs. Protocol B | Protocol A/B vs. reference tissue |                      |                       |
|----------------|---------------------------|-----------------------------------|----------------------|-----------------------|
|                | Comparison round          | Comparison experiment             |                      | Validation experiment |
|                |                           | Protocol A                        | Protocol B           | Protocol B            |
| <i>ANK2</i>    | 0.155                     | 0.059                             | 0.414                | 0.323                 |
| <i>ANK3</i>    | 0.985                     | 0.505                             | 0.652                | 1.7*E <sup>-6*</sup>  |
| <i>CACNA1C</i> | 0.349                     | 0.087                             | 0.699                | 0.115                 |
| <i>GJA1</i>    | 7.5*E <sup>-5*</sup>      | 3.6*E <sup>-5*</sup>              | 0.239                | 0.6                   |
| <i>HCN4</i>    | 0.453                     | 0.439                             | 0.776                | 4.6*E <sup>-6*</sup>  |
| <i>KCND3</i>   | 0.057                     | 1*E <sup>-6*</sup>                | 2.2*E <sup>-6*</sup> | 1.1*E <sup>-9*</sup>  |
| <i>KCNH2</i>   | 0.570                     | 0.010*                            | 0.539                | 0.176                 |
| <i>KCNJ2</i>   | 7.8*E <sup>-4*</sup>      | 8.9*E <sup>-5*</sup>              | 0.983                | 0.413                 |
| <i>KCNJ8</i>   | 0.288                     | 1.1*E <sup>-16*</sup>             | 0.081                | 0.504                 |
| <i>KCNQ1</i>   | 0.491                     | 5.2*E <sup>-6*</sup>              | 0.002*               | 0.027*                |
| <i>MYH6</i>    | 0.105                     | 0.016*                            | 0.013*               | 0.285                 |
| <i>MYH7</i>    | 0.015*                    | 0.002*                            | 0.171                | 0.539                 |
| <i>RYR2</i>    | 0.042*                    | 2.8*E <sup>-6*</sup>              | 9.9*E <sup>-4*</sup> | 4.87*E <sup>-5*</sup> |
| <i>TNNI3</i>   | 0.026*                    | 5.6*E <sup>-7*</sup>              | 0.0023*              | 0.035*                |
| <i>TNNT2</i>   | 0.138                     | 1.7*E <sup>-4*</sup>              | 0.037*               | 0.175                 |

P-values were corrected for multiple testing using Tukey's correction. \*p≤0.05

**Table S4.** Action potential properties for iPSC-CMs generated in the comparison experiment.

| Used protocol                    | Protocol A |               |               | Protocol B |                  |                 |
|----------------------------------|------------|---------------|---------------|------------|------------------|-----------------|
|                                  | Control 2  | BrS patient 1 | BrS patient 2 | Control 2  | BrS patient 1    | BrS patient 2   |
| Cell line                        |            |               |               |            |                  |                 |
| Number of AP recordings          | 4          | 8             | 8             | 10         | 9                | 13              |
| Number of analysed AP recordings | 0*         | 0*/†          | 1             | 0*/‡       | 4                | 2               |
| APD50 [ms]                       | -          | -             | 422.08        | -          | 351.51±<br>24.84 | 273.7±<br>40.83 |
| APD90 [ms]                       | -          | -             | 501.8         | -          | 509.95±<br>27.91 | 422.3±<br>10.9  |
| APA [mV]                         | -          | -             | 114.5         | -          | 90.8±<br>5.1     | 86.7±<br>17.3   |
| RMP [mV]                         | -          | -             | -59.3         | -          | -59.6±<br>3.1    | -58.3±<br>5.4   |
| BPM                              | -          | -             | 8             | -          | 17±<br>1.12      | 27±<br>3        |

\*Recordings with RMP >-40 mV; †Recordings with proper RMP but cells did not fire AP; ‡Declined seal quality due to vivid beating

\*\*No proper recordings were obtained from Control 1 for both tested protocols.

**Table S5. Action potential and calcium transient properties for iPSC-CMs generated in validation experiment.**

|                                         | Protocol B      |                |                |
|-----------------------------------------|-----------------|----------------|----------------|
|                                         | Control 2       | BrS patient 1  | BrS patient 2  |
| <b>Number of analysed AP recordings</b> | 4               | 0              | 7              |
| <b>APD50 [ms]</b>                       | 617.2±<br>54.5  | -              | 260.7±<br>59   |
| <b>APD90 [ms]</b>                       | 767.6±<br>56.4  | -              | 371.5±<br>72.3 |
| <b>APA [mV]</b>                         | 93.9±<br>8.4    | -              | 94±<br>4       |
| <b>RMP [mV]</b>                         | -56.3±<br>3.4   | -              | -60.9±<br>4.1  |
| <b>BPM</b>                              | 21±<br>1        | -              | 11±<br>0.3     |
| <b>Number of analysed CT recordings</b> | 9               | 11             | 0              |
| <b>CTD50 [ms]</b>                       | 1305.3±<br>41.9 | 389.7±<br>36.5 | -              |
| <b>CTD70 [ms]</b>                       | 1988.9±<br>65.6 | 571.7±<br>52.1 | -              |
| <b>BD [s]</b>                           | 6.62±<br>0.31   | 3.53±<br>0.06  | -              |
| <b>BPM</b>                              | 9±<br>0.4       | 17±<br>0.3     | -              |
| <b>Rise time [ms]</b>                   | 824.3±<br>24.6  | 202.3±<br>17.9 | -              |
| <b>RC [ms]</b>                          | 1108.1±<br>43.4 | 380.3±<br>28.9 | -              |

**Table S6. Previously reported AP properties from commercial iPSC-CMs and iPSC-CMs differentiated using monolayer-based protocols**

| Reference                           | Differentiation protocol                      | Culture duration | Patching temperature | AP parameters |           |             |           | n   |
|-------------------------------------|-----------------------------------------------|------------------|----------------------|---------------|-----------|-------------|-----------|-----|
|                                     |                                               |                  |                      | RMP           | APA       | APD50       | APD90     |     |
| Bett et. al. (2013)[1]              | Commercial iCell CMs                          |                  | RT                   | -63±5.8       | 83±11     |             | 955±103   | 25  |
| Gibson et.al. (2014) [2]            | Commercial iCell CMs                          |                  | RT                   | -68±9         | 103±9     |             | 427±65    | 8   |
| Meijer Van Puten et. al. (2015) [3] | Monolayer-based with CHIR 99021 and IWP4      | 30 days          | 36±1                 | -56±4         | 73±9      |             | 162±27    | 9   |
| Lopez-Redondo et. al. (2016) [4]    | Commercial iCell CMs                          |                  | 36±1                 | -43.3±1.7     | 79.4±2.9  | 309.4±29.5  |           | 54  |
| Jeziorowska et. al. (2016) [5]      | Monolayer-based using CHIR99021 and IWP2/IWR1 | 28-35 days       | 37                   | -69.5±9.5     | 96.6±15.5 | 586.8±404.3 | 726±489.6 | 156 |
| Herron et. al. (2016) [6]           | Commercial iCell CMs                          |                  | 37                   | -59.3±1.7     | 105±5     |             |           | 6   |
| Feaster et. al. (2016) [7]          | Monolayer-based with CHIR99021 and IWR1 + B27 | 30-35 days       | RT                   | -74±1         | 118±3     | 326±13      | 378±14    | 53  |

**Table S7. Previously reported CT properties from iPSC-CMs differentiated using monolayer-based protocols.**

| Reference                   | Differentiation protocol                | Culture duration | Imaging temperature | CT parameters |             |                |            |       |
|-----------------------------|-----------------------------------------|------------------|---------------------|---------------|-------------|----------------|------------|-------|
|                             |                                         |                  |                     | CTD90 [ms]    | CTD50 [ms]  | Rise time [ms] | Decay [ms] | n     |
| Paci et. al. (2020) [8]     | Commercial iCell <sup>2</sup> CMs       |                  | 21±1                | 1826.2±1071.3 | 920.1±456.3 |                |            | 42    |
| Shah et. al. (2020) [9]     | END-2 co-culture                        | 30 days          | 36±1                | 1900±100      |             | 480±20         | 250±20     | 68    |
| Shah et. al. (2019) [10]    | END-2 co-culture                        | 30 days          | 36±1                |               |             | 251±29         | 2261±676   | 34    |
| Higgins et. al. (2019) [11] | Monolayer-based with CHIR99021 and IWP2 | 60 days          | 36±1                |               | 1533±100    |                | 2790±50    | 200   |
| Ahola et. al. (2017) [12]   | END-2 co-culture                        | Not specified    | 36±1                | 1663±570      | 797±227     |                |            | 13    |
| Liang et. al. (2016) [13]   | Monolayer-based with CHIR99021 and IWR1 | 40-60 days       | 36±1                |               | 471.3±12.6  | 92±6.6         |            | 10-25 |

**Table S8. Immunofluorescence blocking buffers and dilutions of used antibodies for pluripotency markers**

| Blocking buffer                    | PBS (Life Technologies)                                                       | Goat serum (Jackson Immunotechnologies; 5%)                                        |                                                                               |                                                                                    |
|------------------------------------|-------------------------------------------------------------------------------|------------------------------------------------------------------------------------|-------------------------------------------------------------------------------|------------------------------------------------------------------------------------|
| <b>Primary antibodies</b>          | Nanog (PA1-097, Life Technologies; dilution 1:500)                            | Tra1-81 (4745S, Cell Signaling Technology dilution 1:200)                          | Oct3/4 (sc-9081, SantaCruz Biotechnology dilution 1:100)                      | Tra1-60 (4746S, Cell Signaling Technology dilution 1:200)                          |
| <b>Matching secondary antibody</b> | Goat anti-rabbit Alexa Fluor 488 (A-11034, Life Technologies; dilution 1:500) | Goat anti-mouse (IgM) Alexa Fluor 555 (A-21426, Life Technologies; dilution 1:500) | Goat anti-rabbit Alexa Fluor 488 (A-11034, Life Technologies; dilution 1:500) | Goat anti-mouse (IgM) Alexa Fluor 555 (A-21426, Life Technologies; dilution 1:500) |

**Table S9. Immunofluorescence blocking buffer and dilutions of used antibodies for cardiac markers.**

| Blocking buffer CM markers           | Goat serum (Jackson Immunotechnologies; 5%)          | PBS (Life Technologies)                              |                                                         |
|--------------------------------------|------------------------------------------------------|------------------------------------------------------|---------------------------------------------------------|
| <b>Primary antibodies</b>            | Cardiac $\alpha$ -actinin (Abcam; dilution 1:300)    | Cardiac troponin I (Abcam; dilution 1:100)           | Nkx2.5 (Abcam; dilution 1:200)                          |
| <b>Matching secondary antibodies</b> | Goat anti rabbit (Life Technologies; dilution 1:500) | Goat anti rabbit (Life Technologies; dilution 1:500) | Goat anti mouse IgG (Life Technologies; dilution 1:500) |

**Table S10. Sendai vectors presence test - PCR reaction protocol**

|                         |      |        |     |
|-------------------------|------|--------|-----|
| <b>Initialization</b>   | 94°C | 5 min  |     |
| <b>Denaturation</b>     | 94°C | 15 sec | 34x |
| <b>Annealing</b>        | 60°C | 30 sec |     |
| <b>Elongation</b>       | 72°C | 45 sec |     |
| <b>Final elongation</b> | 72°C | 10 min |     |
| <b>Final hold</b>       | 10°C | 1 min  |     |

**Table S11. Cardiac markers qPCR primers**

|                        | <b>FORWARD 5'-3'</b>     | <b>REVERSE 5'-3'</b>      |
|------------------------|--------------------------|---------------------------|
| <b>REFERENCE GENES</b> |                          |                           |
| <b>GAPDH</b>           | TGCACCACCAACTGCTTAGC     | GGCATGGACTGTGGTCATGAG     |
| <b>ECHS1</b>           | AAGGCCCTCAATGCACCTTG     | ACTCAGGTTCTGCATTCCTTG     |
| <b>RPL13A</b>          | CCTGGAGGAGAAGAGGAAAAGAGA | TTGAGGACCTCTGTGTATTTGTCAA |
| <b>TARGET GENES</b>    |                          |                           |
| <b>ANK2</b>            | TGGACTTCACAGCCAGGAAT     | GCCTCGATCCAGTAAGAGCT      |
| <b>ANK3</b>            | ACCAAAGGAGGACAGCAACT     | GAAAAGACAGACGACCACAGG     |
| <b>CACNA1C</b>         | TGACATCGAGGGAGAAAACCT    | ACATTAGACTTGACTGCGGC      |
| <b>GJA1 (CX43)</b>     | GGTGACTGGAGCGCCTTAG      | GCGCACATGAGAGATTGGGA      |
| <b>HCN4</b>            | ACCCATGCTACAGGACTTCC     | GAAGAGCGCGTAGGAGTACT      |
| <b>KCND3</b>           | AAACAATCACAGGGACTGGC     | ACACCATTGTCACCATGACC      |
| <b>KCNH2</b>           | TCCTTCTCCATCACACCTC      | AAATCGCCTTCTACCGGAAA      |
| <b>KCNJ2</b>           | GTGCGAACCAACCGCTACA      | CCAGCGAATGTCCACACAC       |
| <b>KCNJ8</b>           | AGTGGAATGGAGAAAAGTGGT    | TCCTCTGTCATCATCCTCCC      |
| <b>KCNQ1</b>           | ACAAAGTACTGCATGCGTCCG    | CATGAGAACCAACAGCTTCG      |
| <b>MYH6</b>            | GATAGAGAGACTCCTGCGGC     | CCGTCTCCCATTTCTCGGT       |
| <b>MYH7</b>            | TCGTGCCTGATGACAAACAGGAGT | ATACTCGGTCTCGGCAGTGACTTT  |
| <b>RYR2</b>            | CATCGAACACTCCTCTACGGA    | GGACACGCTAACTAAGATGAGGT   |
| <b>TNNI3</b>           | TGTGGACAAGGTGGATGAAG     | CCGCTTAAACTTGCCTCGAA      |
| <b>TNNT2</b>           | GGAGGAGCTCGTTTCTCTCA     | CCTCCTGTTCTCCTCCTCCT      |



- [1] G.C. Bett, A.D. Kaplan, A. Lis, T.R. Cimato, E.S. Tzanakakis, Q. Zhou, M.J. Morales, and R.L. Rasmusson, Electronic "expression" of the inward rectifier in cardiocytes derived from human-induced pluripotent stem cells. *Heart Rhythm* 10 (2013) 1903-10.
- [2] J.K. Gibson, Y. Yue, J. Bronson, C. Palmer, and R. Numann, Human stem cell-derived cardiomyocytes detect drug-mediated changes in action potentials and ion currents. *J Pharmacol Toxicol Methods* 70 (2014) 255-67.
- [3] R.M. Meijer van Putten, I. Mengarelli, K. Guan, J.G. Zegers, A.C. van Ginneken, A.O. Verkerk, and R. Wilders, Ion channelopathies in human induced pluripotent stem cell derived cardiomyocytes: a dynamic clamp study with virtual IK1. *Front Physiol* 6 (2015) 7.
- [4] F. Lopez-Redondo, J. Kurokawa, F. Nomura, T. Kaneko, T. Hamada, T. Furukawa, and K. Yasuda, A distribution analysis of action potential parameters obtained from patch-clamped human stem cell-derived cardiomyocytes. *J Pharmacol Sci* 131 (2016) 141-5.
- [5] D. Jeziorowska, V. Fontaine, C. Jouve, E. Villard, S. Dussaud, D. Akbar, V. Letang, P. Cervello, J.M. Itier, M.P. Pruniaux, and J.S. Hulot, Differential Sarcomere and Electrophysiological Maturation of Human iPSC-Derived Cardiac Myocytes in Monolayer vs. Aggregation-Based Differentiation Protocols. *Int J Mol Sci* 18 (2017).
- [6] T.J. Herron, A.M. Rocha, K.F. Campbell, D. Ponce-Balbuena, B.C. Willis, G. Guerrero-Serna, Q. Liu, M. Klos, H. Musa, M. Zarzoso, A. Bizy, J. Furness, J. Anumonwo, S. Mironov, and J. Jalife, Extracellular Matrix-Mediated Maturation of Human Pluripotent Stem Cell-Derived Cardiac Monolayer Structure and Electrophysiological Function. *Circ Arrhythm Electrophysiol* 9 (2016) e003638.
- [7] T.K. Feaster, A.G. Cadar, L. Wang, C.H. Williams, Y.W. Chun, J.E. Hempel, N. Bloodworth, W.D. Merryman, C.C. Lim, J.C. Wu, B.C. Knollmann, and C.C. Hong, Matrigel Mattress: A Method for the Generation of Single Contracting Human-Induced Pluripotent Stem Cell-Derived Cardiomyocytes. *Circ Res* 117 (2015) 995-1000.
- [8] M. Paci, E. Passini, A. Klimas, S. Severi, J. Hyttinen, B. Rodriguez, and E. Entcheva, All-Optical Electrophysiology Refines Populations of In Silico Human iPSC-CMs for Drug Evaluation. *Biophys J* 118 (2020) 2596-2611.
- [9] D. Shah, C. Prajapati, K. Penttinen, R.M. Cherian, J.T. Koivumaki, A. Alexanova, J. Hyttinen, and K. Aalto-Setälä, hiPSC-Derived Cardiomyocyte Model of LQT2 Syndrome Derived from Asymptomatic and Symptomatic Mutation Carriers Reproduces Clinical Differences in Aggregates but Not in Single Cells. *Cells* 9 (2020).
- [10] D. Shah, L. Virtanen, C. Prajapati, M. Kiamehr, J. Gullmets, G. West, J. Kreutzer, M. Pekkanen-Mattila, T. Helio, P. Kallio, P. Taimen, and K. Aalto-Setälä, Modeling of LMNA-Related Dilated Cardiomyopathy Using Human Induced Pluripotent Stem Cells. *Cells* 8 (2019).
- [11] E.M. Higgins, J.M. Bos, S.M. Dotzler, C.S. John Kim, and M.J. Ackerman, MRAS Variants Cause Cardiomyocyte Hypertrophy in Patient-Specific Induced Pluripotent Stem Cell-Derived Cardiomyocytes: Additional Evidence for MRAS as a Definitive Noonan Syndrome-Susceptibility Gene. *Circ Genom Precis Med* 12 (2019) e002648.
- [12] A. Ahola, R.P. Polonen, K. Aalto-Setälä, and J. Hyttinen, Simultaneous Measurement of Contraction and Calcium Transients in Stem Cell Derived Cardiomyocytes. *Ann Biomed Eng* 46 (2018) 148-158.
- [13] P. Liang, K. Sallam, H. Wu, Y. Li, I. Itzhaki, P. Garg, Y. Zhang, V. Vermglinchan, F. Lan, M. Gu, T. Gong, Y. Zhuge, C. He, A.D. Ebert, V. Sanchez-Freire, J. Churko, S. Hu, A. Sharma, C.K. Lam, M.M. Scheinman, D.M. Bers, and J.C. Wu, Patient-Specific and Genome-Edited Induced Pluripotent Stem Cell-Derived Cardiomyocytes Elucidate Single-Cell Phenotype of Brugada Syndrome. *J Am Coll Cardiol* 68 (2016) 2086-2096.
